# Supplementary material
Source: PubMed Central journal article supplement (PMC6851416)
Supplement: NIHMS1034717-supplement-Supp_FigS1.pdf [file NIHMS1034717-supplement-Supp_FigS1.pdf]

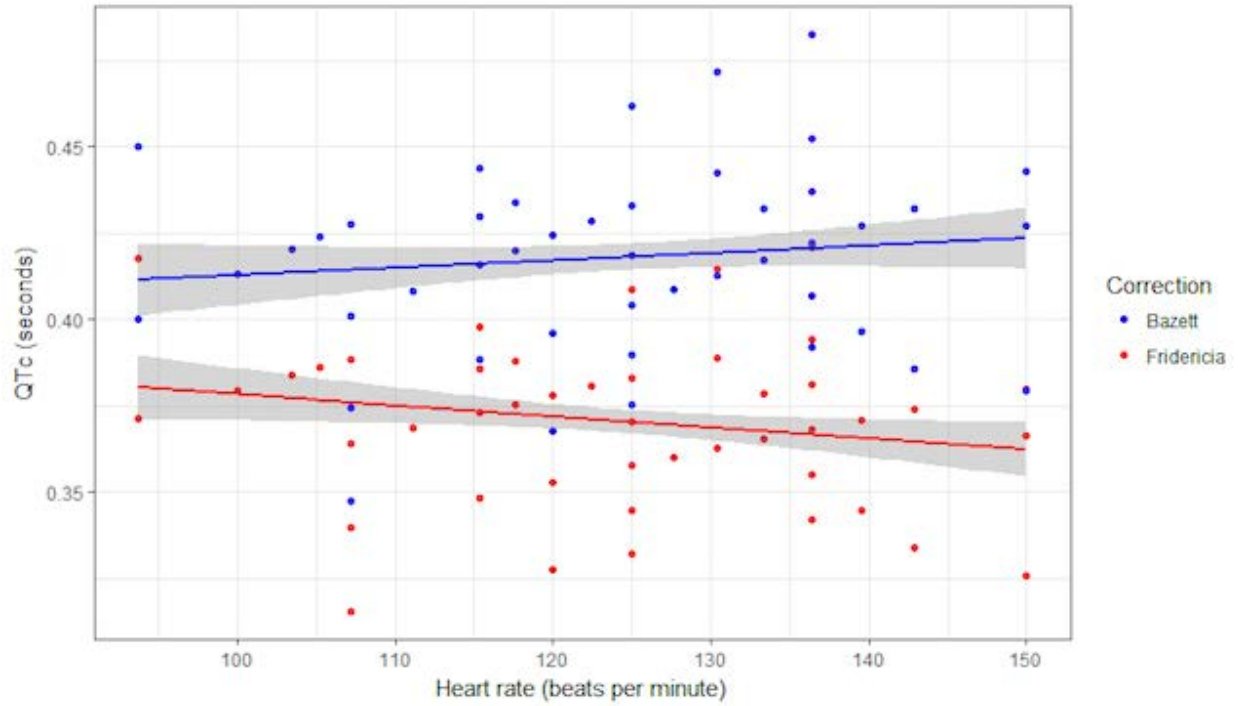

**Figure S1.** Correlation between heart rate and QTc correction in children. Increased heart rate was associated with an increased QTcF in both week 32 ( $p=0.01$ ) and week 104 ECGs ( $p=0.02$ ). There were no association between heart rate and QTcB ( $p=0.25$ ).
